# Supplementary material
Source: PubMed Central journal article supplement (PMC3494769)

**Figure 1. A Sexual Network of Men of Color Who Have Sex with Men, North Carolina, 1989-2010**

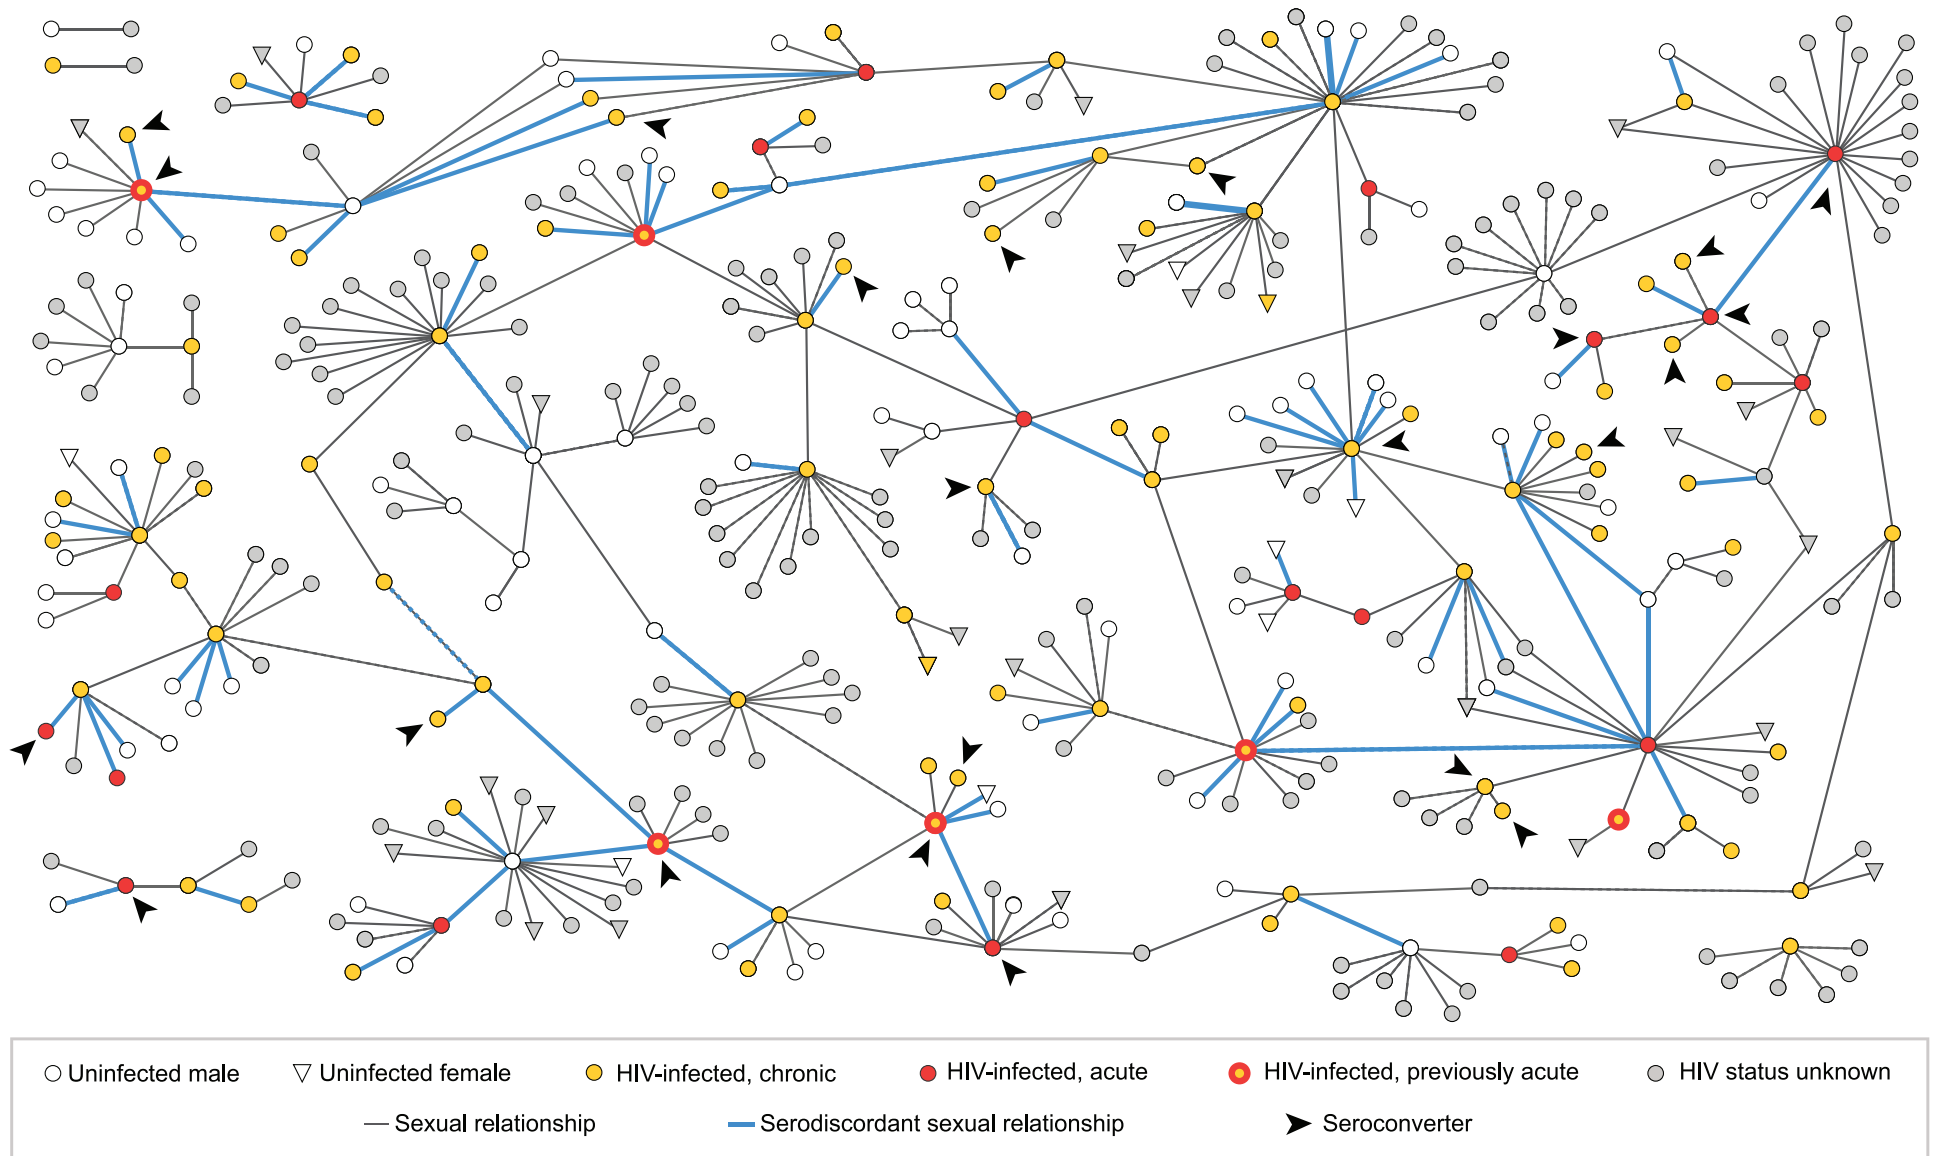

**Figure S1. Network Structure, 1989-2000**

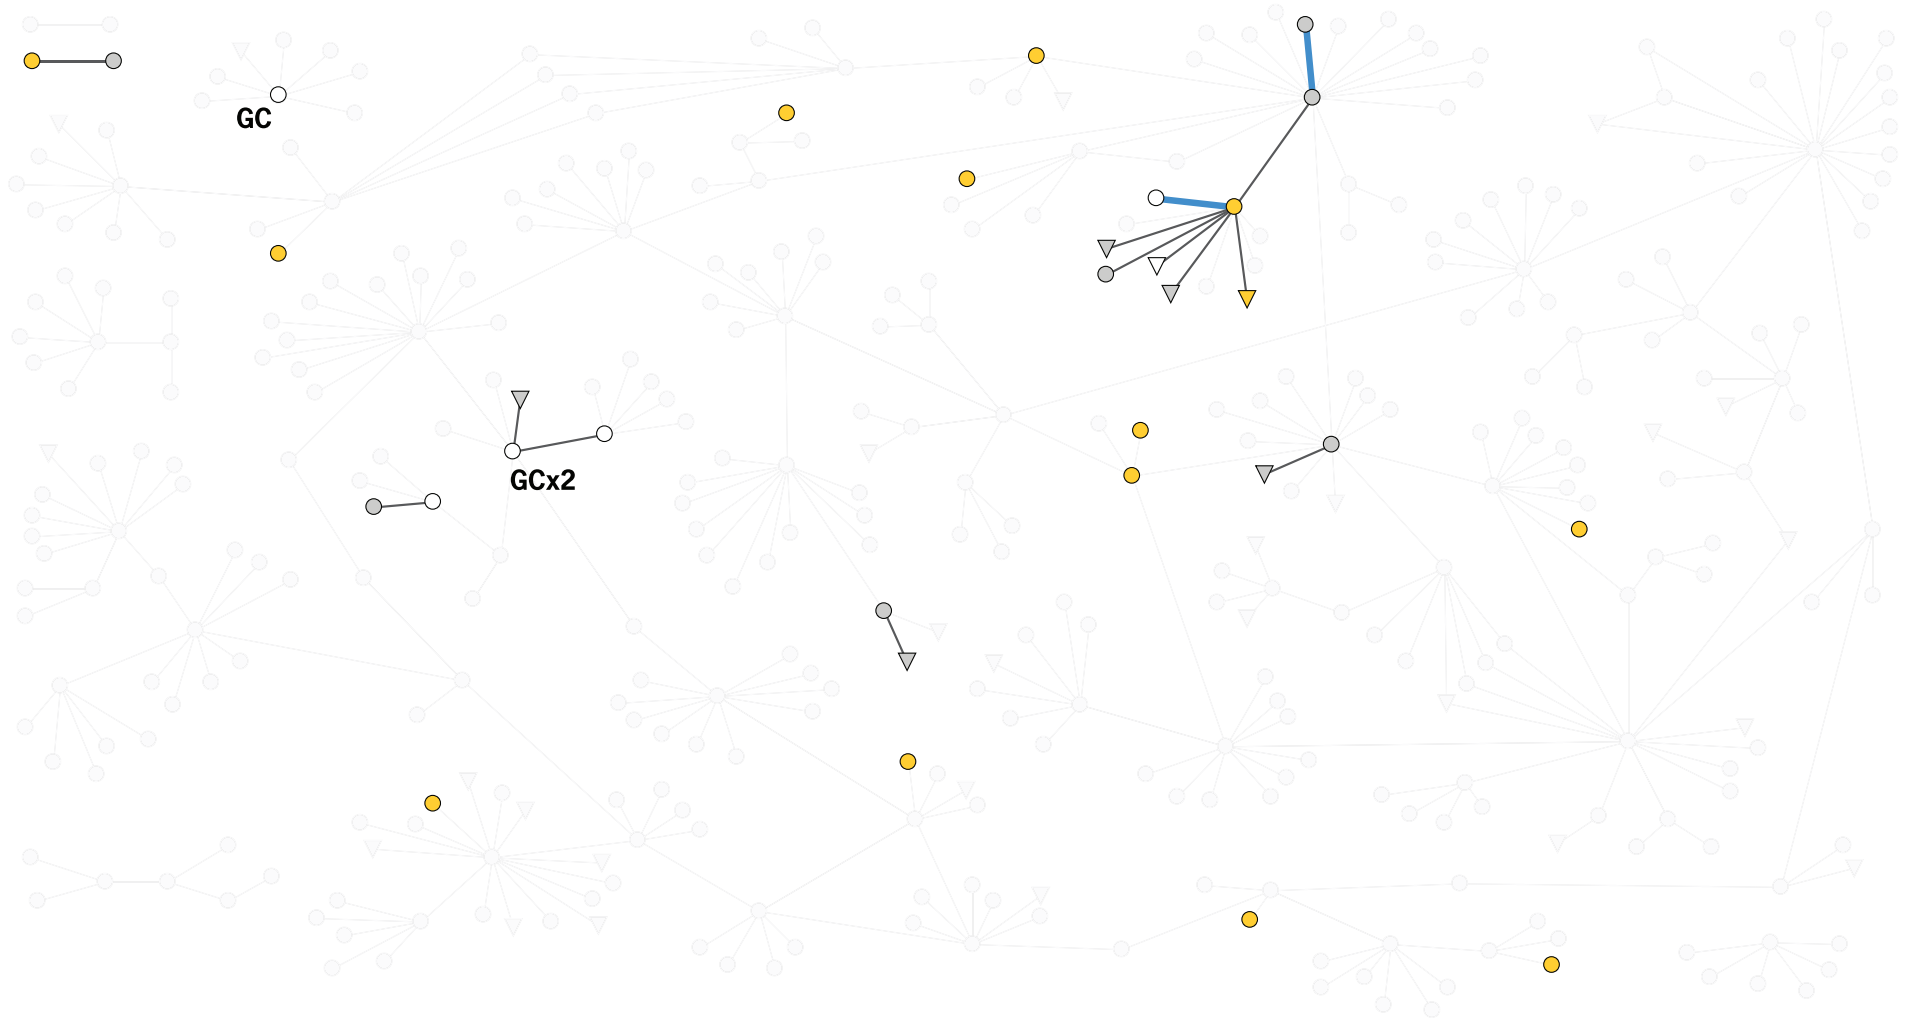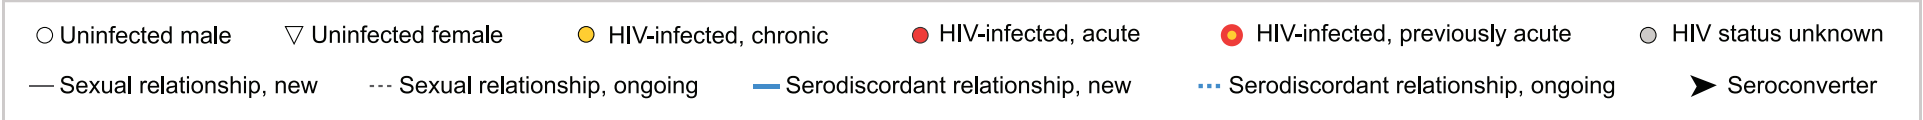

**Figure S2. Network Structure, 2001-2002**

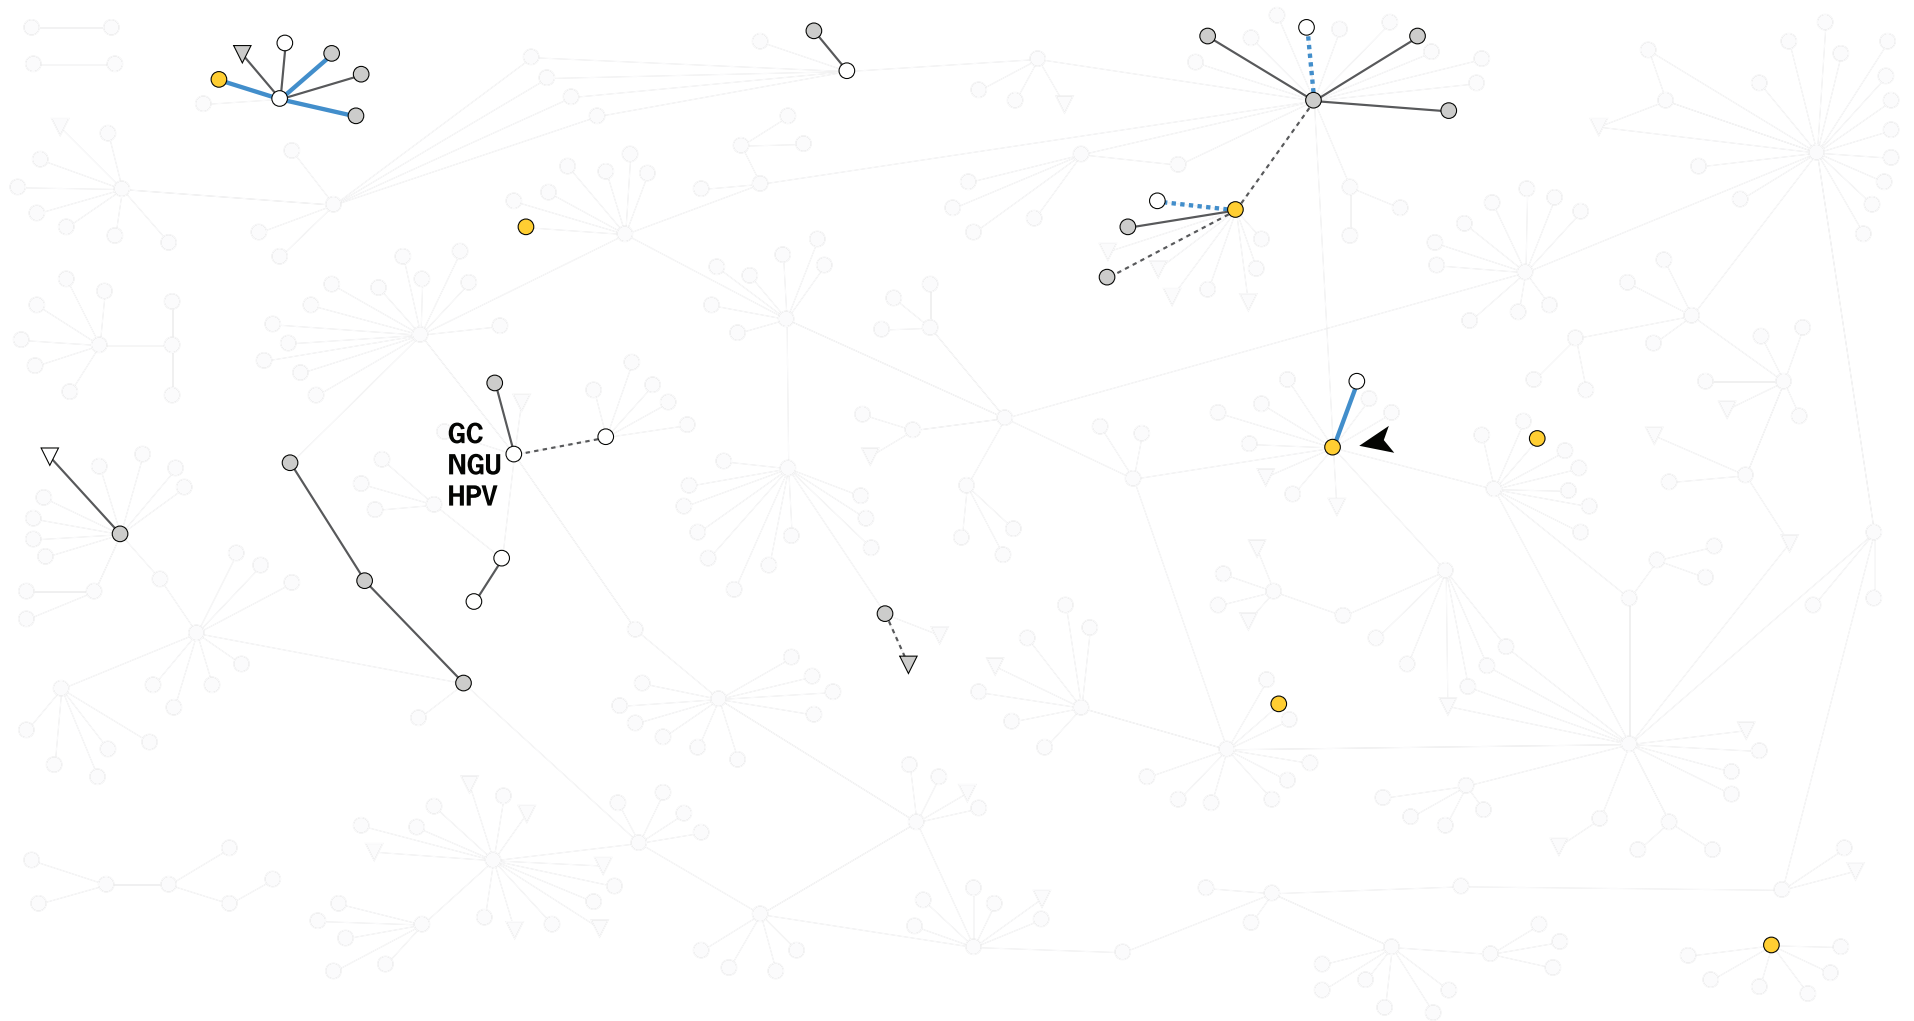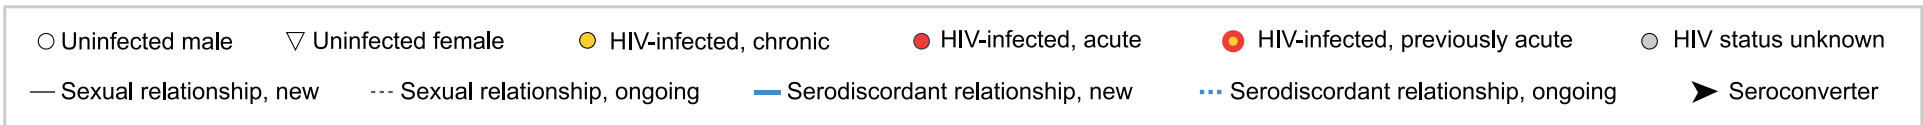

**Figure S3. Network Structure, 2003-2004**

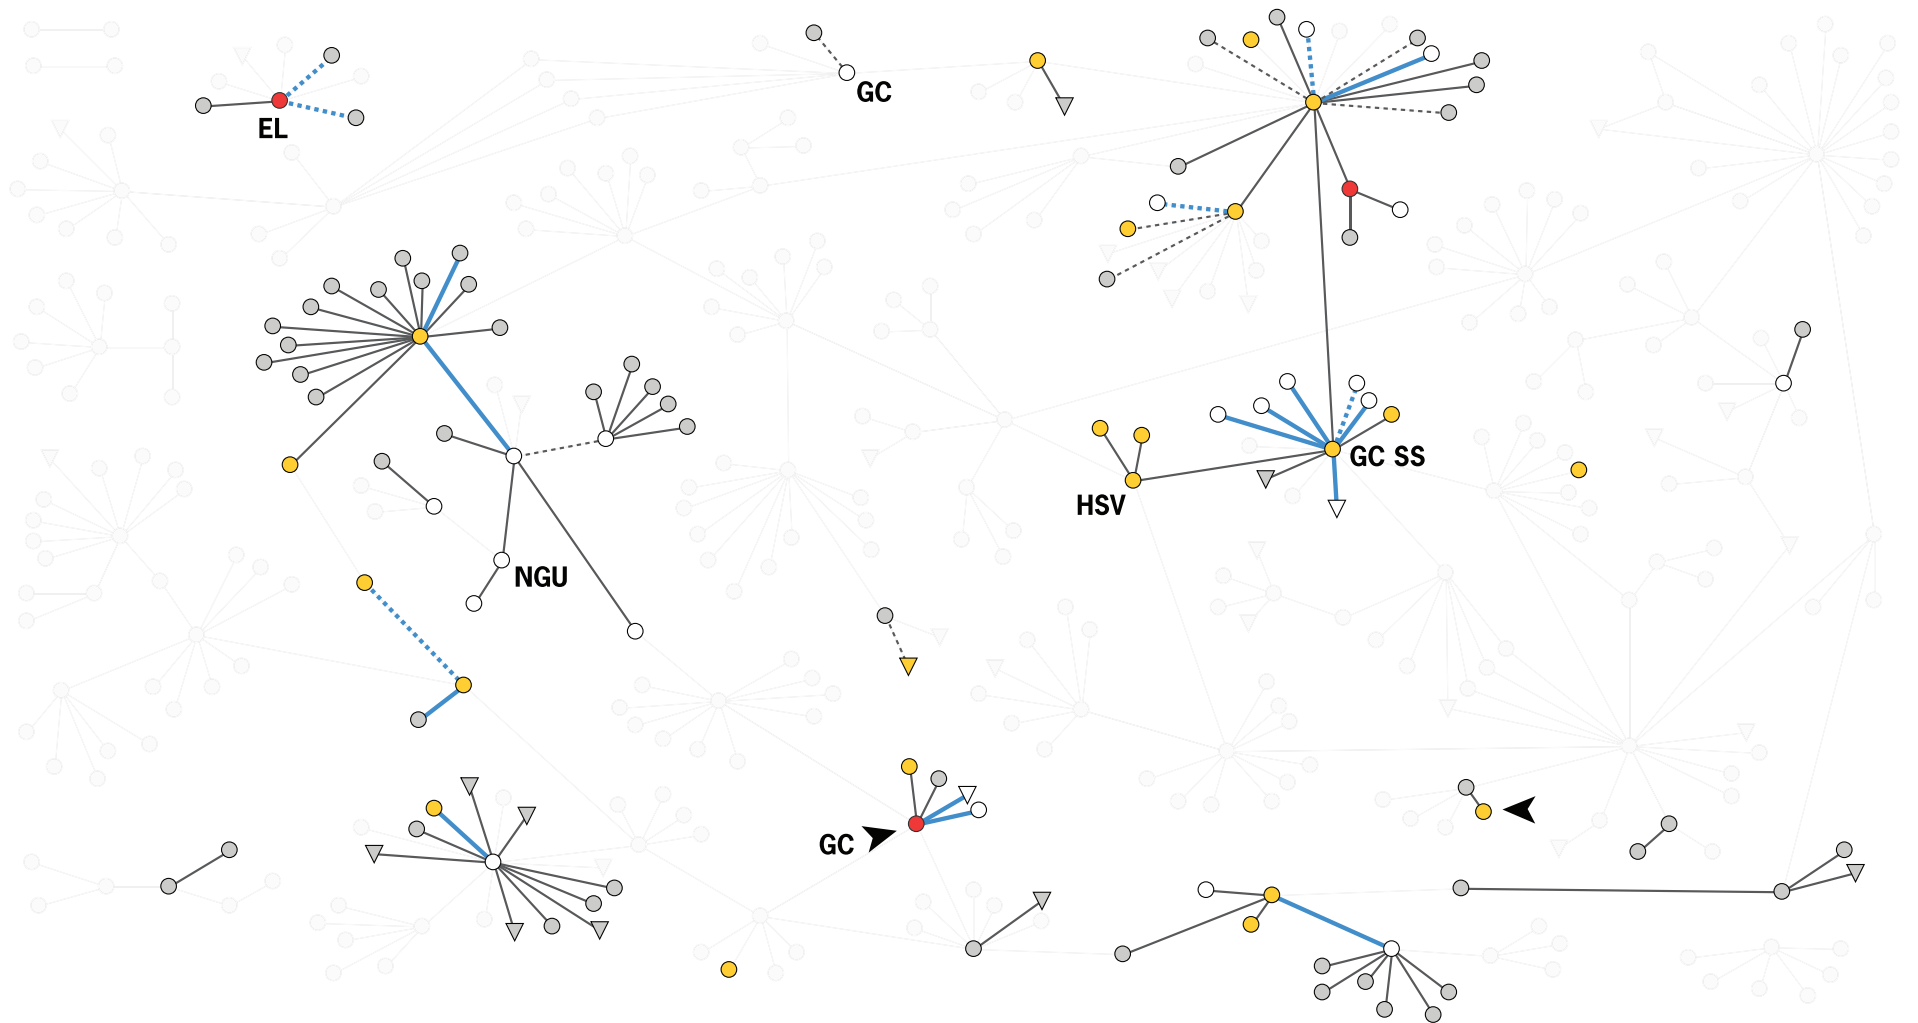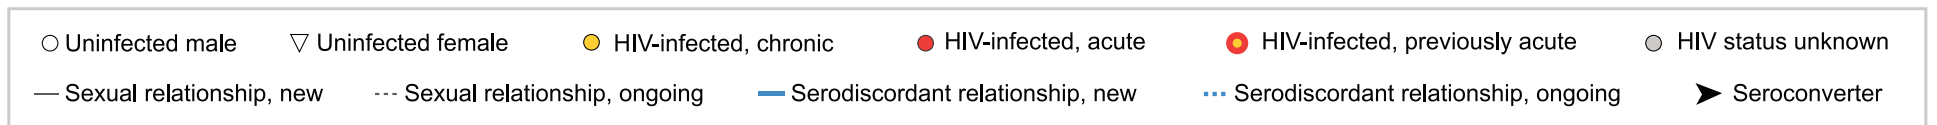

**Figure S4. Network Structure, 2005-2006**

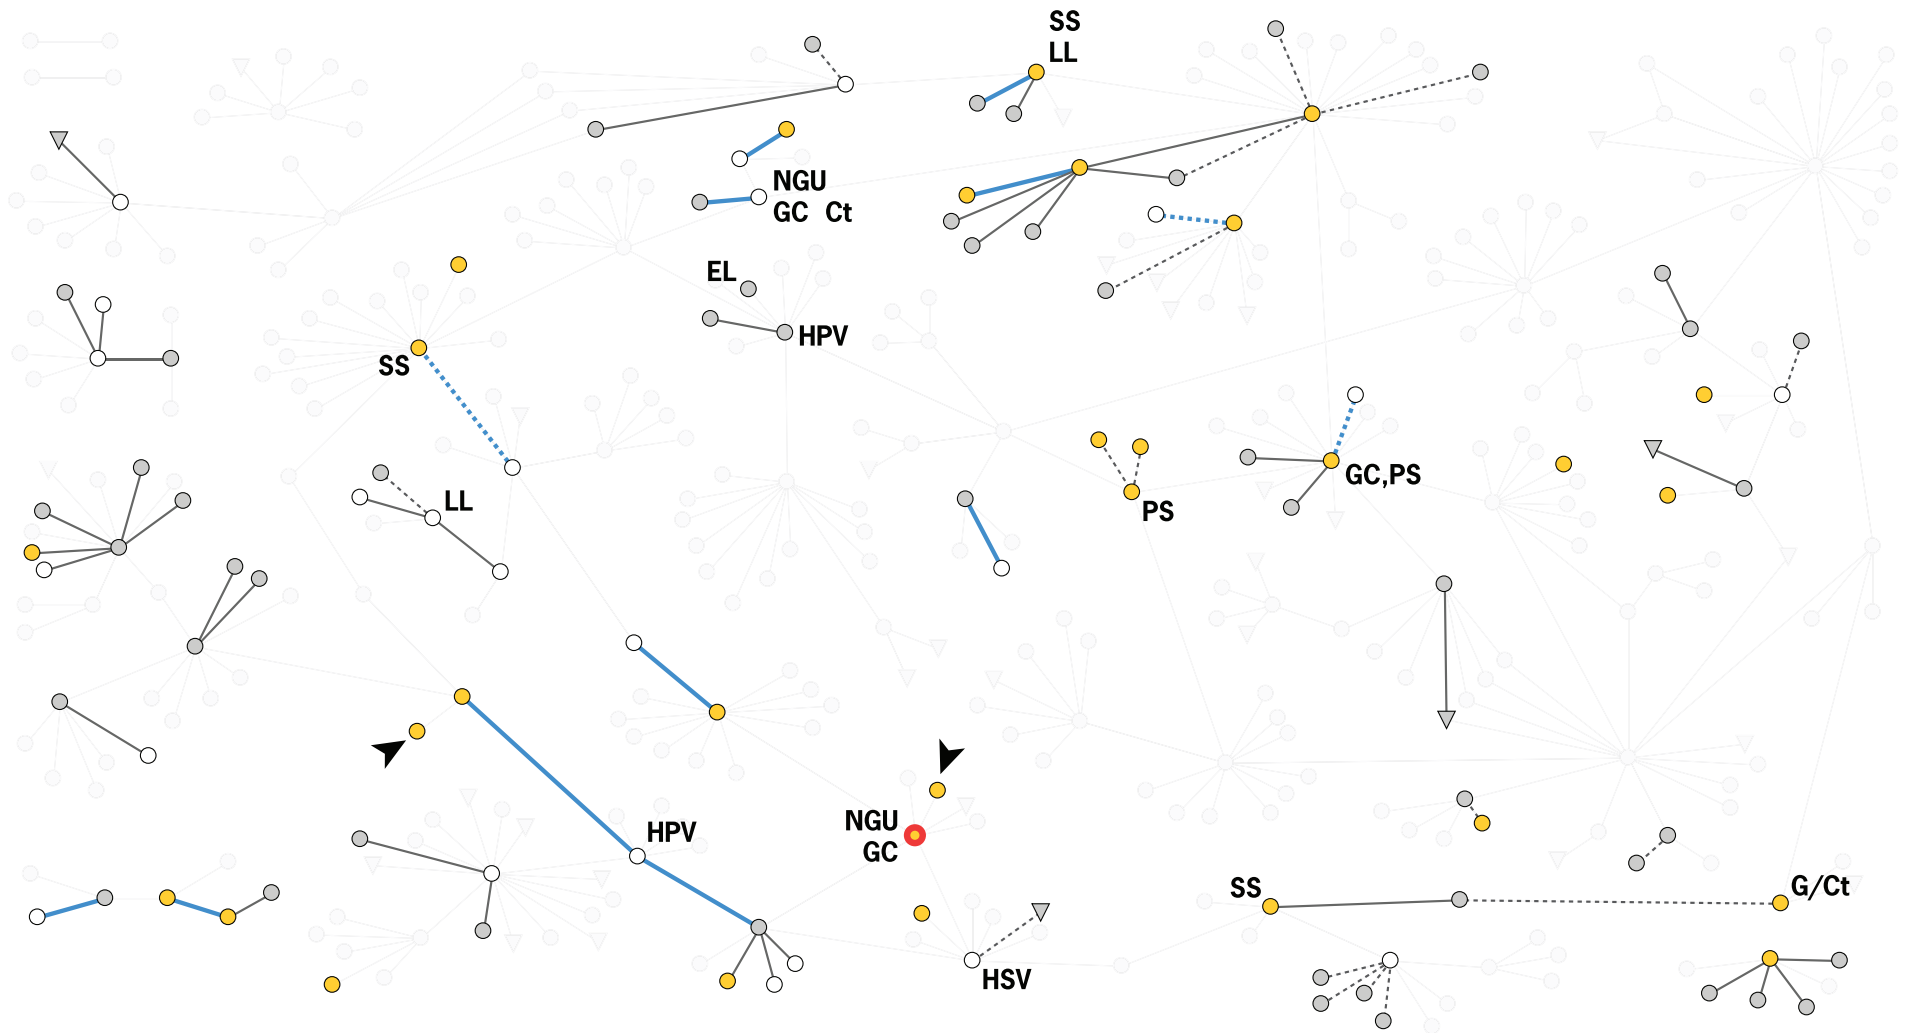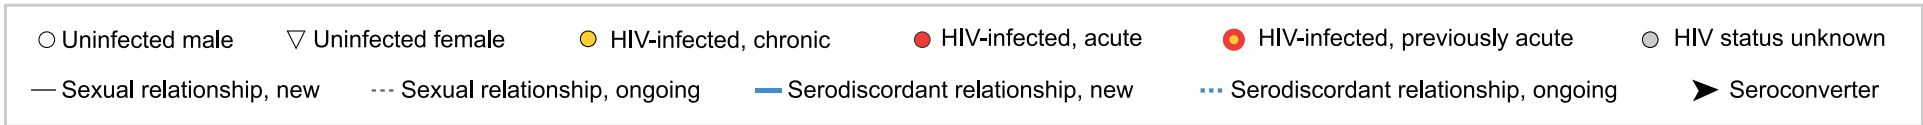

**Figure S5. Network Structure, 2007-2008**

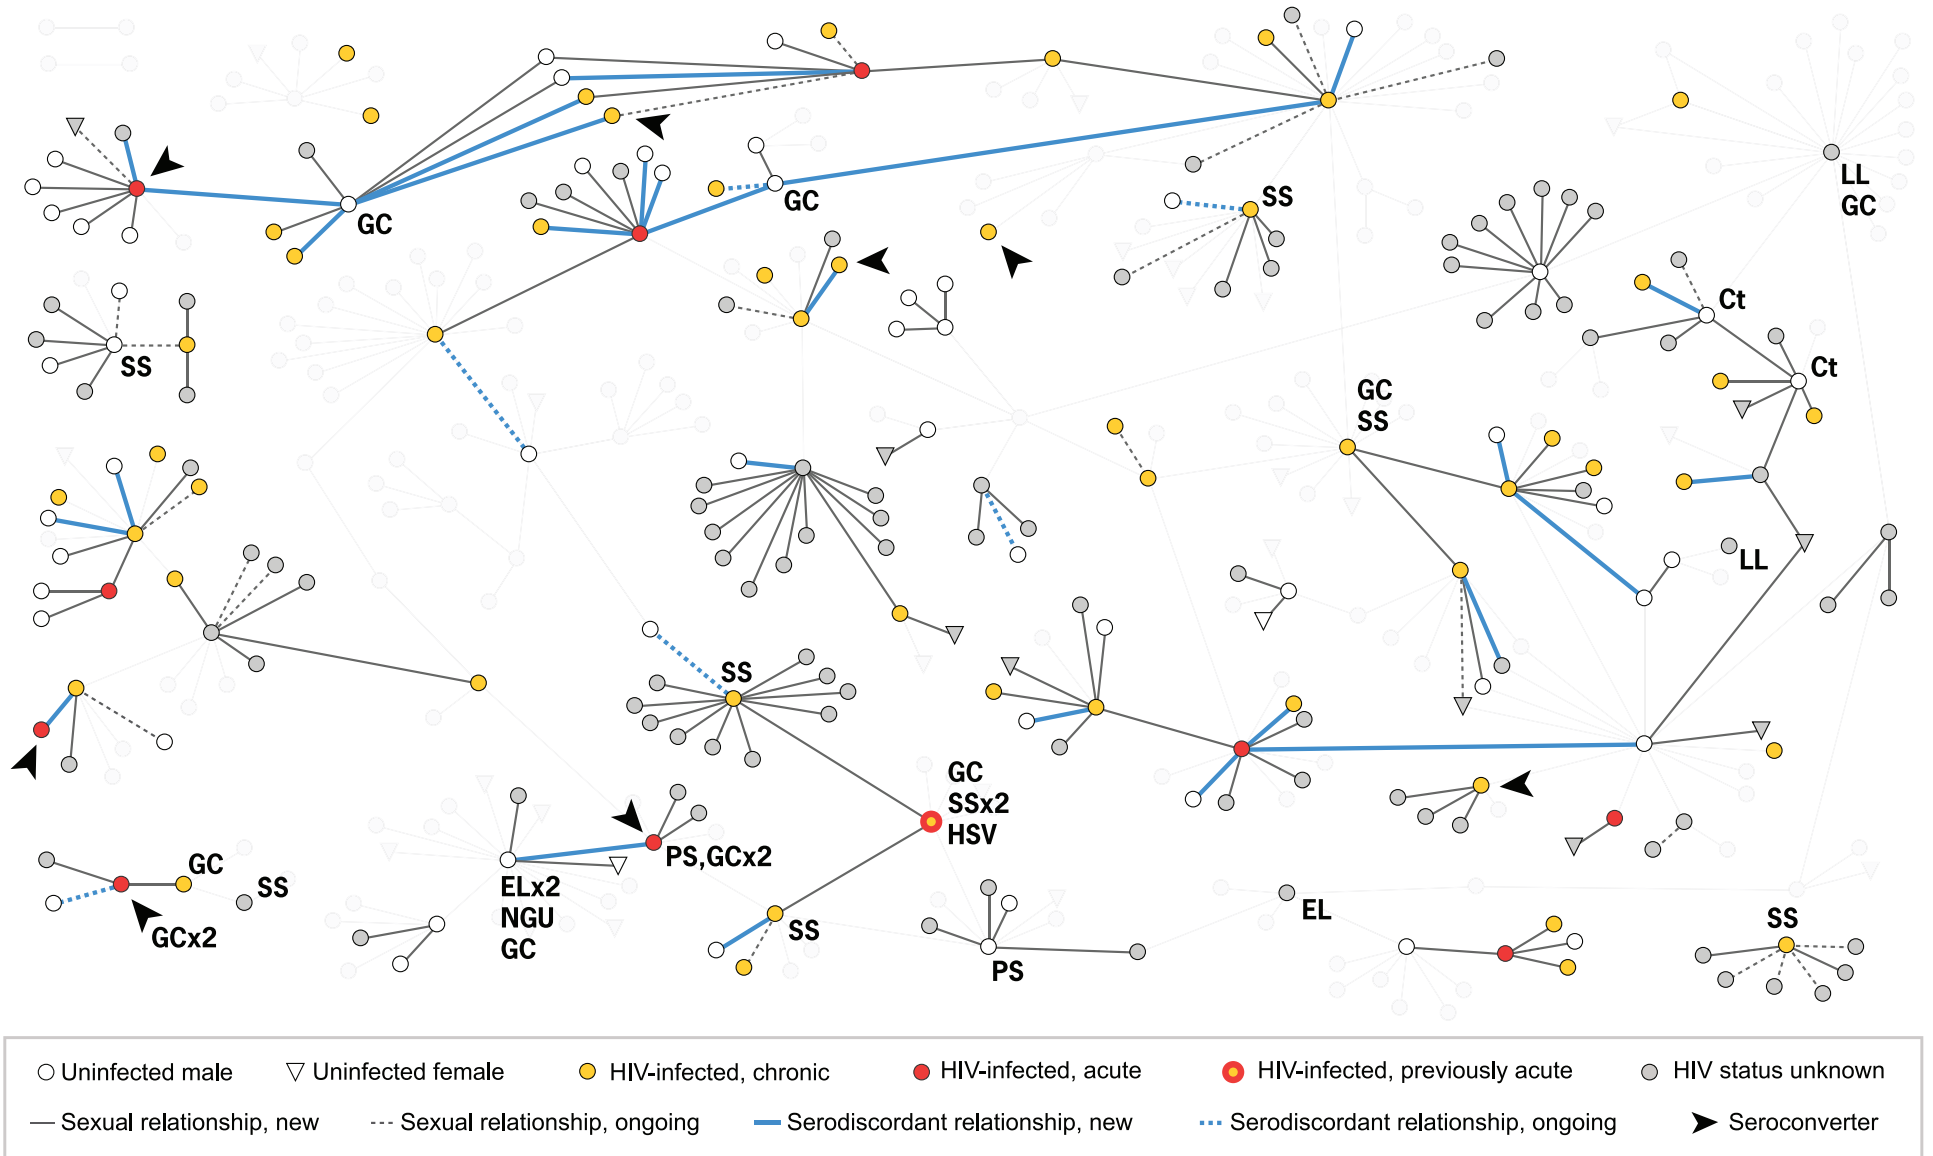

**Figure S6. Network Structure, 2009-2010**

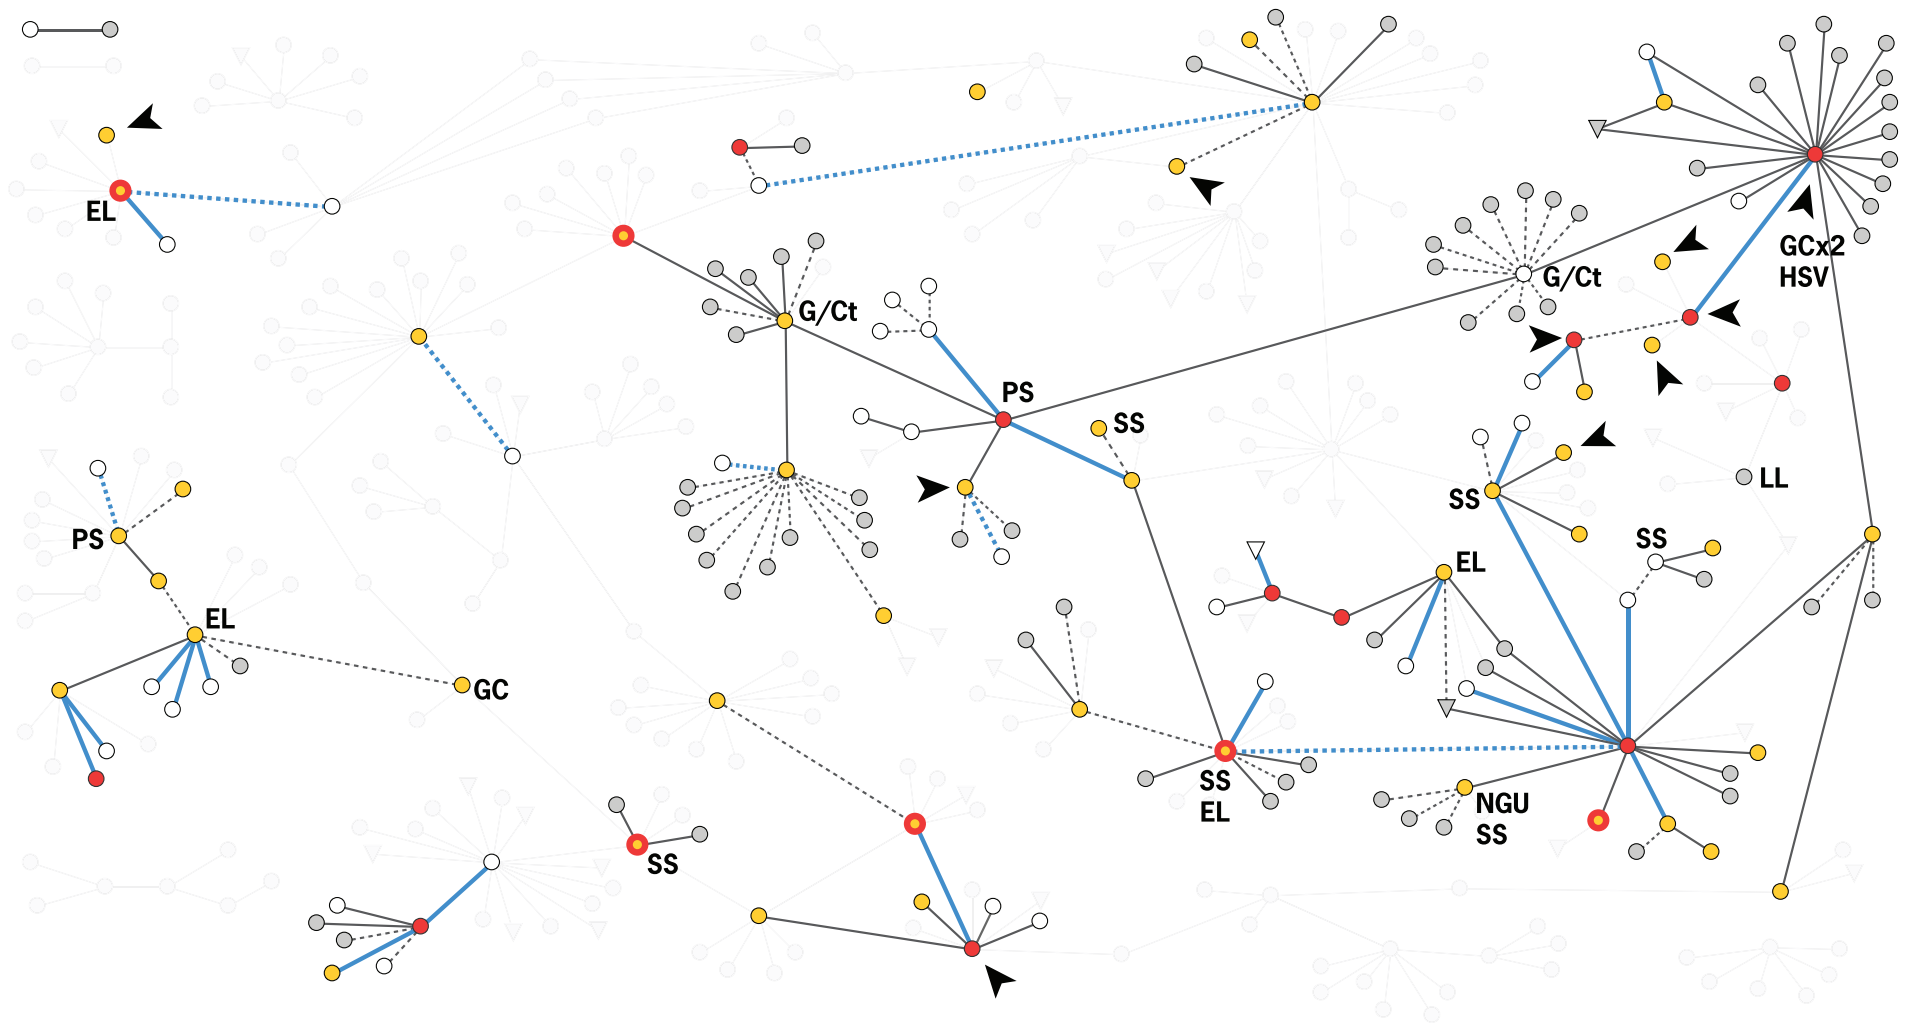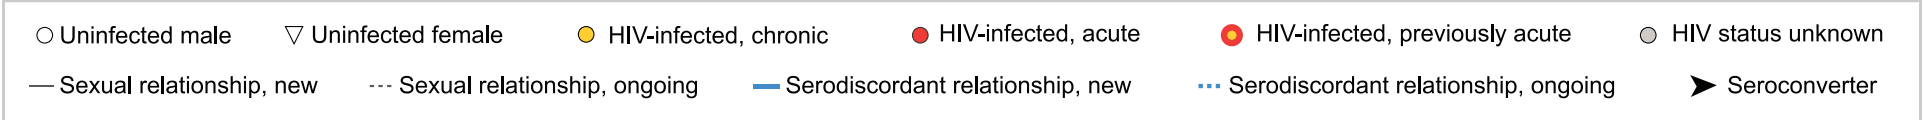

Supplement: NIHMS409769-supplement-1.pdf [file NIHMS409769-supplement-1.pdf]
